# Supplementary material
Source: PubMed Central journal article supplement (PMC6424671)
Supplement: NIHMS1507586-supplement-12035_2018_1349_MOESM1_ESM.pdf [file NIHMS1507586-supplement-12035_2018_1349_MOESM1_ESM.pdf]

# Supplementary Material

## Molecular Neurobiology

### Diltiazem Promotes Regenerative Axon Growth

Eric A. Huebner<sup>1,2</sup>, Stéphane Budel<sup>2</sup>, Zhaoxin Jiang<sup>2</sup>, Takao Omura<sup>1</sup>,  
Tammy Szu-Yu Ho<sup>1</sup>, Lee Barrett<sup>1</sup>, Janie S. Merkel<sup>3</sup>, Luis M. Pereira<sup>4</sup>, Nick A. Andrews<sup>1</sup>,  
Xingxing Wang<sup>2</sup>, Bhagat Singh<sup>1</sup>, Kush Kapur<sup>1</sup>, Michael Costigan<sup>1,4</sup>,  
Stephen M. Strittmatter<sup>2,\*</sup>, Clifford J. Woolf<sup>1,\*</sup>

<sup>1</sup>F.M. Kirby Neurobiology Center, Boston Children's Hospital and Harvard Medical School, Boston, Massachusetts 02115, USA.

<sup>2</sup>Cellular Neuroscience, Neurodegeneration and Repair Program, Departments of Neurology and Neuroscience, Yale University School of Medicine, New Haven, Connecticut 06520, USA.

<sup>3</sup>Yale Center for Molecular Discovery, Yale University, West Haven, CT 06516, USA.

<sup>4</sup>Department of Anesthesiology, Perioperative and Pain Medicine, Boston Children's Hospital and Harvard Medical School, Boston, Massachusetts 02115, USA.

\*Co-corresponding author.

Correspondence: [stephen.strittmatter@yale.edu](mailto:stephen.strittmatter@yale.edu), [clifford.woolf@childrens.harvard.edu](mailto:clifford.woolf@childrens.harvard.edu)

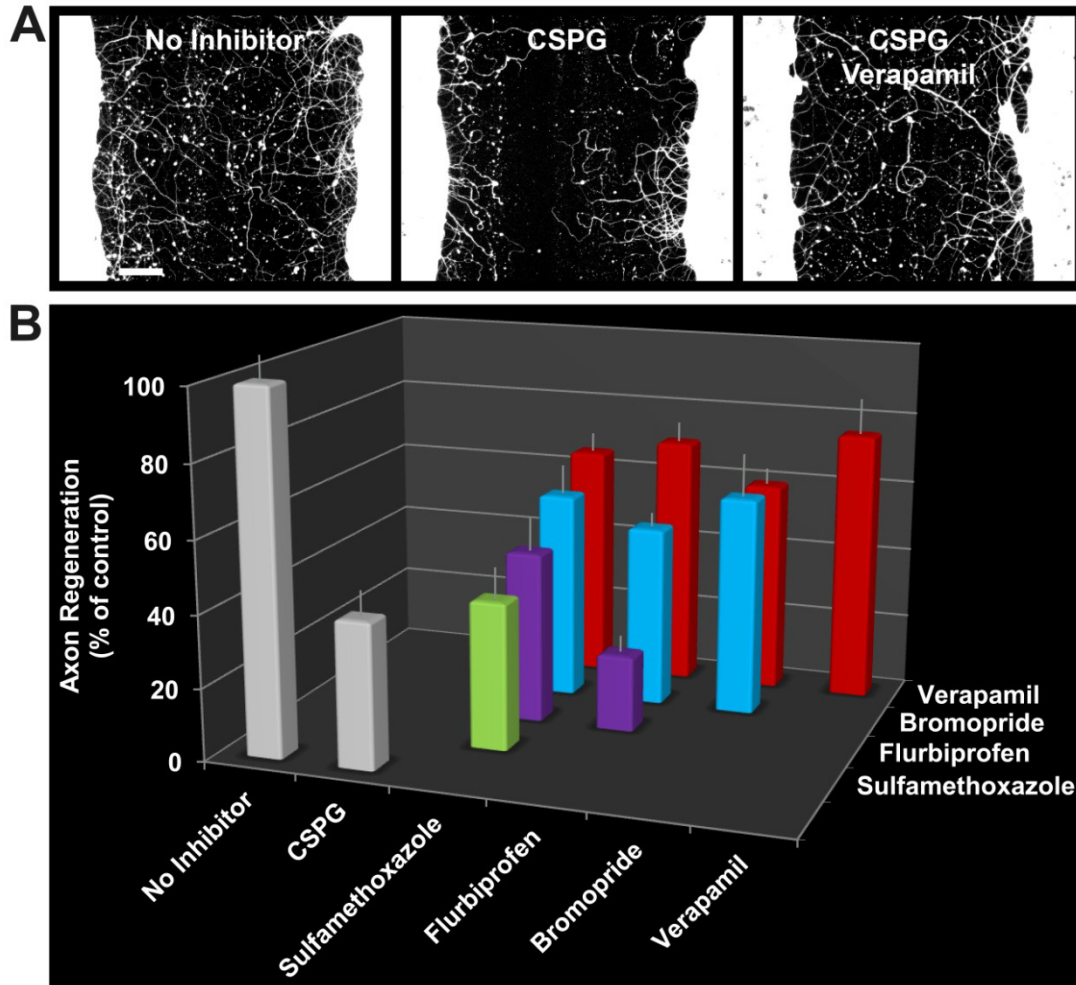

**Supplementary Fig. 1** Lack of drug synergy. *A*,  $\beta$ III-tubulin immunostaining of cortical cultures after five days of regeneration under the indicated conditions. *B*, Quantification of axon regeneration. All conditions include CSPG except for the no inhibitor control. No enhancement of axon regeneration occurs for combinations of drugs relative to the drugs individually (one-way ANOVA, post hoc Bonferroni). Data are mean  $\pm$  S.E.  $n = 6-18$ . Scale bar, 100  $\mu$ m.

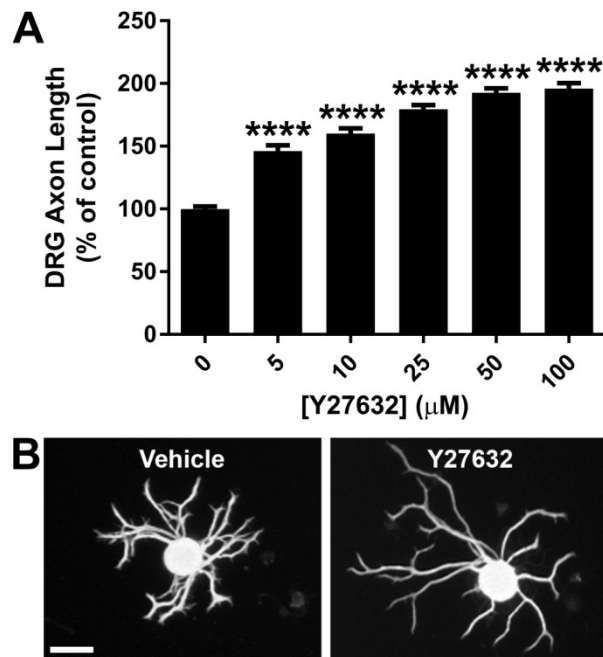

**Supplementary Fig. 2** Y27632 promotes DRG axon outgrowth. **A**, Y27632 concentration-response for DRG axon outgrowth on CSPG. Y27632 (100  $\mu\text{M}$ ) increases the total axon length per neuron by 2.0-fold. **B**,  $\beta$ III-tubulin immunostaining of DRG neurons cultured on CSPG for 24 hours in the presence of Y27632 (100  $\mu\text{M}$ ) or vehicle. Data are mean  $\pm$  S.E.  $n = 48-96$ . Scale bar, 100  $\mu\text{m}$ . \*\*\*\*,  $p < 0.0001$ , one-way ANOVA, post hoc Dunnett.

## Supplementary Table 1. Compound Library (Gen-Plus, MicroSource)

| MOLECULE NAME                                                | THERAPEUTIC CLASS                                                            |
|--------------------------------------------------------------|------------------------------------------------------------------------------|
| N- (3-TRIFLUOROMETHYLPHENYL)PIPERAZINE HYDROCHLORIDE (TFMPP) | 5HT agonist                                                                  |
| 1-PHENYLBIGUANIDE HYDROCHLORIDE                              | 5HT3 receptor agonist                                                        |
| PHENYLBIGUANIDE                                              | 5HT3 receptor agonist                                                        |
| 8-CYCLOPENTYLTHEOPHYLLINE                                    | A1 adenosine agonist                                                         |
| 1,3-DIPROPYL-8-CYCLOPENTYLXANTHINE [DPCPX]                   | A1 adenosine antagonist                                                      |
| AZOBENZENE                                                   | acaricide                                                                    |
| ROTENONE                                                     | acaricide, ectoparasiticide, antineoplastic, mitochondrial poison            |
| LISINOPRIL                                                   | ACE inhibitor                                                                |
| ENALAPRIL MALEATE                                            | ACE inhibitor, antihypertensive                                              |
| VESAMICOL HYDROCHLORIDE                                      | acetylcholine transport blocker (vesicular)                                  |
| EDROPHONIUM CHLORIDE                                         | acetylcholinesterase inhibitor                                               |
| DONEPIZIL HYDROCHLORIDE                                      | acetylcholinesterase inhibitor (reversible)                                  |
| COLFORSIN                                                    | adenylate cyclase activator, antiglaucoma                                    |
| VERAPAMIL HYDROCHLORIDE                                      | adrenergic blocker, Ca channel blocker, coronary vasodilator, antiarrhythmic |
| OCTOPAMINE HYDROCHLORIDE                                     | adrenergic agonist                                                           |
| TUAMINOHEPTANE SULFATE                                       | adrenergic agonist                                                           |
| TYRAMINE                                                     | adrenergic agonist                                                           |
| OXIDOPAMINE HYDROCHLORIDE                                    | adrenergic agonist (ophthalmic)                                              |
| N-METHYL (-)EPHEDRINE                                        | adrenergic agonist, analeptic                                                |
| NOREPINEPHRINE                                               | adrenergic agonist, antihypotensive                                          |
| ADRENALINE BITARTRATE                                        | adrenergic agonist, bronchodilator, antiglaucoma agent                       |
| AMIODARONE HYDROCHLORIDE                                     | adrenergic agonist, coronary vasodilator, Ca channel blocker                 |
| NAPHAZOLINE HYDROCHLORIDE                                    | adrenergic agonist, nasal decongestant                                       |
| OXYMETAZOLINE HYDROCHLORIDE                                  | adrenergic agonist, nasal decongestant                                       |
| TETRAHYDROZOLINE HYDROCHLORIDE                               | adrenergic agonist, nasal decongestant                                       |
| XYLOMETAZOLINE HYDROCHLORIDE                                 | adrenergic agonist, nasal decongestant                                       |
| LABETALOL HYDROCHLORIDE                                      | adrenergic blocker                                                           |
| TOLAZOLINE HYDROCHLORIDE                                     | adrenergic blocker                                                           |
| NADIDE                                                       | alcohol and narcotic antagonist                                              |
| PHENOXYBENZAMINE HYDROCHLORIDE                               | alpha adrenergic blocker                                                     |
| YOHIMBINE HYDROCHLORIDE                                      | alpha adrenergic blocker, mydriatic, antidepressant                          |
| METHOXAMINE HYDROCHLORIDE                                    | alpha1 adrenoreceptor agonist, vasoconstrictor                               |
| RAUWOLSCINE HYDROCHLORIDE                                    | alpha2 adrenergic antagonist                                                 |
| p-FLUOROPHENYLALANINE                                        | amino acid antagonist, protein synthesis inhibitor                           |
| IPRIFLAVONE                                                  | anabolic                                                                     |
| METHOXYVONE                                                  | anabolic                                                                     |
| PIPERINE                                                     | analeptic, antibacterial                                                     |
| ANTIPYRINE                                                   | analgesic                                                                    |

|                               |                                                       |
|-------------------------------|-------------------------------------------------------|
| GLAFENINE                     | analgesic                                             |
| NEFOPAM                       | analgesic                                             |
| PHENAZOPYRIDINE HYDROCHLORIDE | analgesic                                             |
| SALICYLAMIDE                  | analgesic                                             |
| XYLAZINE                      | analgesic                                             |
| (-)-MENTHOL                   | analgesic (topical), antipruritic agent               |
| EUGENOL                       | analgesic (topical), antiseptic, antifungal           |
| E-CAPSAICIN                   | analgesic (topical), depletes Substance P, neurotoxic |
| CARBAMAZEPINE                 | analgesic, anticonvulsant                             |
| DIFLUNISAL                    | analgesic, antiinflammatory                           |
| FOSFOSAL                      | analgesic, antiinflammatory                           |
| GENTISIC ACID                 | analgesic, antiinflammatory                           |
| INDOPROFEN                    | analgesic, antiinflammatory                           |
| NIFENAZONE                    | analgesic, antiinflammatory                           |
| NIFLUMIC ACID                 | analgesic, antiinflammatory                           |
| ZOMEPIRAC SODIUM              | analgesic, antiinflammatory                           |
| ACETAMINOPHEN                 | analgesic, antipyretic                                |
| ACETAMINOSALOL                | analgesic, antipyretic                                |
| ACETANILIDE                   | analgesic, antipyretic                                |
| DIPLOSALSALATE                | analgesic, antipyretic                                |
| DIPYRONE                      | analgesic, antipyretic                                |
| METERGOLINE                   | analgesic, antipyretic                                |
| PHENACETIN                    | analgesic, antipyretic                                |
| SALICIN                       | analgesic, antipyretic                                |
| ASPIRIN                       | analgesic, antipyretic, antiinflammatory              |
| RAMIFENAZONE                  | analgesic, antipyretic, antiinflammatory              |
| SUXIBUZONE                    | analgesic, antipyretic, antiinflammatory              |
| TETRAHYDROPALMATINE           | analgesic, hypnotic, papaverine-like                  |
| NALBUPHINE HYDROCHLORIDE      | analgesic, narcotic antagonist                        |
| TESTOSTERONE                  | androgen, antineoplastic                              |
| TESTOSTERONE PROPIONATE       | androgen, antineoplastic                              |
| ACONITINE                     | anesthetic (gastric), antipyretic, and cardiotoxin    |
| BUPIVACAINE HYDROCHLORIDE     | anesthetic (local)                                    |
| BUTACAINE                     | anesthetic (local)                                    |
| BUTAMBEN                      | anesthetic (local)                                    |
| DIBUCAINE HYDROCHLORIDE       | anesthetic (local)                                    |
| OXETHAZAINE                   | anesthetic (local)                                    |
| PRILOCAINE HYDROCHLORIDE      | anesthetic (local)                                    |
| PROCAINE HYDROCHLORIDE        | anesthetic (local)                                    |
| SALICYL ALCOHOL               | anesthetic (local)                                    |
| TETRACAINE HYDROCHLORIDE      | anesthetic (local)                                    |
| LIDOCAINE HYDROCHLORIDE       | anesthetic (local), antiarrhythmic                    |
| BENZOCAINE                    | anesthetic (topical)                                  |

|                            |                                                                                   |
|----------------------------|-----------------------------------------------------------------------------------|
| DYCLONINE HYDROCHLORIDE    | anesthetic (topical)                                                              |
| PRAMOXINE HYDROCHLORIDE    | anesthetic (topical)                                                              |
| SAFROLE                    | anesthetic (topical) and antiseptic, pediculicide                                 |
| BUPROPION                  | antidepressant                                                                    |
| DANAZOL                    | anterior pituitary suppressant                                                    |
| ALBENDAZOLE                | anthelmintic                                                                      |
| DICHLOROPHENE              | anthelmintic                                                                      |
| DIETHYLCARBAMAZINE CITRATE | anthelmintic                                                                      |
| FENBENDAZOLE               | anthelmintic                                                                      |
| MEBENDAZOLE                | anthelmintic                                                                      |
| NICOLSAMIDE                | anthelmintic                                                                      |
| OXYBENDAZOLE               | anthelmintic                                                                      |
| PRAZIQUANTEL               | anthelmintic                                                                      |
| PYRANTEL PAMOATE           | anthelmintic                                                                      |
| PYRVINIUM PAMOATE          | anthelmintic                                                                      |
| THIABENDAZOLE              | anthelmintic                                                                      |
| ARECOLINE HYDROBROMIDE     | anthelmintic (Cestodes), hypotensive, cathartic                                   |
| HELENINE                   | anthelmintic, antibacterial, antineoplastic                                       |
| QUINACRINE HYDROCHLORIDE   | anthelmintic, antimalarial, intercalating agent                                   |
| PARAROSANILINE PAMOATE     | anthelmintic, antischistosomal                                                    |
| BITHIONOL                  | anthelmintic, antiseptic                                                          |
| HYCANTHONE                 | anthelmintic, hepatotoxic                                                         |
| HARMALOL HYDROCHLORIDE     | anthelmintic, narcotic agent                                                      |
| HEXYLRESORCINOL            | anthelmintic, topical antiseptic                                                  |
| AZELAIC ACID               | antiacne, antiproliferative agent                                                 |
| IDOQUINOL                  | antiamebic                                                                        |
| QUASSIN                    | antiamebic                                                                        |
| TETRACYCLINE HYDROCHLORIDE | antiamebic, antibacterial, antirickettsial                                        |
| CYPROTERONE                | antiandrogen                                                                      |
| CYPROTERONE ACETATE        | antiandrogen                                                                      |
| FLUTAMIDE                  | antiandrogen                                                                      |
| LEUCOVORIN CALCIUM         | antianemic, antidote to folic acid antagonists                                    |
| ISOSORBIDE DINITRATE       | antianginal                                                                       |
| MOLSIDOMINE                | antianginal                                                                       |
| NIFEDIPINE                 | antianginal, antihypertensive                                                     |
| DISOPYRAMIDE PHOSPHATE     | antiarrhythmic                                                                    |
| PROCAINAMIDE HYDROCHLORIDE | antiarrhythmic                                                                    |
| PROPAFENONE HYDROCHLORIDE  | antiarrhythmic                                                                    |
| AJMALINE                   | antiarrhythmic (Class Ia): inhibits glucose uptake by mitochondria, & PAF blocker |
| HYDROQUINIDINE             | antiarrhythmic, antimalarial                                                      |
| QUINIDINE GLUCONATE        | antiarrhythmic, antimalarial                                                      |
| ADENOSINE                  | antiarrhythmic, cardiac depressant                                                |

|                              |                                                                  |
|------------------------------|------------------------------------------------------------------|
| OUABAIN                      | antiarrhythmic, cardiotonic, hypertensive, Na/K ATPase inhibitor |
| ACETYLCHOLINE                | antiarrhythmic, miotic, vasodilator (peripheral)                 |
| BETAINE HYDROCHLORIDE        | antiarteriosclerotic, hypolipaemic, hepatoprotectant             |
| ACETYLGLUCOSAMINE            | antiarthritic                                                    |
| GLUCOSAMINE HYDROCHLORIDE    | antiarthritic                                                    |
| CELECOXIB                    | antiarthritic, cyclooxygenase2 inhibitor                         |
| KETOTIFEN FUMARATE           | antiasthmatic                                                    |
| CROMOLYN SODIUM              | antiasthmatic, antiallergy                                       |
| LOBELINE HYDROCHLORIDE       | antiasthmatic, respiratory stimulant                             |
| BECLOMETHASONE DIPROPIONATE  | antiasthmatic, topical antiinflammatory                          |
| 3-AMINOPROPANESULPHONIC ACID | antibacterial                                                    |
| ALEXIDINE HYDROCHLORIDE      | antibacterial                                                    |
| AMIKACIN SULFATE             | antibacterial                                                    |
| AMOXICILLIN                  | antibacterial                                                    |
| AMPICILLIN SODIUM            | antibacterial                                                    |
| AZITHROMYCIN                 | antibacterial                                                    |
| BACITRACIN                   | antibacterial                                                    |
| CARBENICILLIN DISODIUM       | antibacterial                                                    |
| CEFADROXIL                   | antibacterial                                                    |
| CEFAZOLIN SODIUM             | antibacterial                                                    |
| CEFOTAXIME SODIUM            | antibacterial                                                    |
| CEPHALOTHIN SODIUM           | antibacterial                                                    |
| CEPHAPIRIN SODIUM            | antibacterial                                                    |
| CEPHRADINE                   | antibacterial                                                    |
| CINOXACIN                    | antibacterial                                                    |
| CLOFOCTOL                    | antibacterial                                                    |
| CLOXACILLIN SODIUM           | antibacterial                                                    |
| COLISTIMETHATE SODIUM        | antibacterial                                                    |
| DEMECLOCYCLINE HYDROCHLORIDE | antibacterial                                                    |
| DICLOXACILLIN SODIUM         | antibacterial                                                    |
| DOXYCYCLINE HYDROCHLORIDE    | antibacterial                                                    |
| ENOXACIN                     | antibacterial                                                    |
| ERYTHROMYCIN                 | antibacterial                                                    |
| ERYTHROMYCIN ETHYLSUCCINATE  | antibacterial                                                    |
| FLUMEQUINE                   | antibacterial                                                    |
| FUSIDIC ACID                 | antibacterial                                                    |
| GENTAMICIN SULFATE           | antibacterial                                                    |
| HETACILLIN POTASSIUM         | antibacterial                                                    |
| KANAMYCIN SULFATE            | antibacterial                                                    |
| LINCOMYCIN HYDROCHLORIDE     | antibacterial                                                    |
| MAFENIDE HYDROCHLORIDE       | antibacterial                                                    |
| MECLOCYCLINE SULFOSALICYLATE | antibacterial                                                    |
| MERBROMIN                    | antibacterial                                                    |

|                             |                                                                   |
|-----------------------------|-------------------------------------------------------------------|
| METHACYCLINE HYDROCHLORIDE  | antibacterial                                                     |
| METHICILLIN SODIUM          | antibacterial                                                     |
| MINOCYCLINE HYDROCHLORIDE   | antibacterial                                                     |
| MOXALACTAM DISODIUM         | antibacterial                                                     |
| NALIDIXIC ACID              | antibacterial                                                     |
| NITROFURANTOIN              | antibacterial                                                     |
| NORFLOXACIN                 | antibacterial                                                     |
| NOVOBIOCIN SODIUM           | antibacterial                                                     |
| OLEANDOMYCIN PHOSPHATE      | antibacterial                                                     |
| OXACILLIN SODIUM            | antibacterial                                                     |
| OXYTETRACYCLINE             | antibacterial                                                     |
| PENICILLIN V POTASSIUM      | antibacterial                                                     |
| PHENETHICILLIN POTASSIUM    | antibacterial                                                     |
| PIPERACILLIN SODIUM         | antibacterial                                                     |
| POLYMYXIN B SULFATE         | antibacterial                                                     |
| ROXARSONE                   | antibacterial                                                     |
| SPECTINOMYCIN HYDROCHLORIDE | antibacterial                                                     |
| SULFABENZAMIDE              | antibacterial                                                     |
| SULFACETAMIDE               | antibacterial                                                     |
| SULFACHLORPYRIDAZINE        | antibacterial                                                     |
| SULFADIAZINE                | antibacterial                                                     |
| SULFADIMETHOXINE            | antibacterial                                                     |
| SULFAGUANIDINE              | antibacterial                                                     |
| SULFAMERAZINE               | antibacterial                                                     |
| SULFAMETER                  | antibacterial                                                     |
| SULFAMETHAZINE              | antibacterial                                                     |
| SULFAMETHIZOLE              | antibacterial                                                     |
| SULFAMETHOXYPYRIDAZINE      | antibacterial                                                     |
| SULFAMONOMETHOXINE          | antibacterial                                                     |
| SULFANILAMIDE               | antibacterial                                                     |
| SULFANITRAN                 | antibacterial                                                     |
| SULFAPHENAZOLE              | antibacterial                                                     |
| SULFAPYRIDINE               | antibacterial                                                     |
| SULFAQUINOXALINE SODIUM     | antibacterial                                                     |
| SULFATHIAZOLE               | antibacterial                                                     |
| SULFISOXAZOLE               | antibacterial                                                     |
| THIAMPHENICOL               | antibacterial                                                     |
| TRIMETHOPRIM                | antibacterial                                                     |
| VANCOMYCIN HYDROCHLORIDE    | antibacterial                                                     |
| DAPSONE                     | antibacterial (leprostatic), dermatitis herpetiformis suppressant |
| CHLORHEXIDINE               | antibacterial (topical), disinfectant                             |
| CAPREOMYCIN SULFATE         | antibacterial (tuberculostatic)                                   |
| CYCLOSERINE                 | antibacterial (tuberculostatic)                                   |



|                                       |                                                                                 |
|---------------------------------------|---------------------------------------------------------------------------------|
| DIHYDROSTREPTOMYCIN SULFATE           | antibacterial (tuberculostatic)                                                 |
| ETHAMBUTOL HYDROCHLORIDE              | antibacterial (tuberculostatic)                                                 |
| ETHIONAMIDE                           | antibacterial (tuberculostatic)                                                 |
| ISONIAZID                             | antibacterial (tuberculostatic)                                                 |
| PASINIAZID                            | antibacterial (tuberculostatic)                                                 |
| PYRAZINAMIDE                          | antibacterial (tuberculostatic)                                                 |
| RIFAMPIN                              | antibacterial (tuberculostatic)                                                 |
| SODIUM p-AMINOSALICYLATE              | antibacterial (tuberculostatic)                                                 |
| STREPTOMYCIN SULFATE                  | antibacterial (tuberculostatic)                                                 |
| METHENAMINE                           | antibacterial (urinary)                                                         |
| GENTIAN VIOLET                        | antibacterial, anthelmintic                                                     |
| AUREOMYCIN                            | antibacterial, antiamebic, Ca chelator, hepatotoxic; inhibits protein synthesis |
| CLOXYQUIN                             | antibacterial, antifungal                                                       |
| PYRITHIONE ZINC                       | antibacterial, antifungal, antiseborrheic                                       |
| SULFAMETHOXAZOLE                      | antibacterial, antipneumocystis                                                 |
| CHLORAMPHENICOL                       | antibacterial, antirickettsial, inhibits protein synthesis                      |
| CHLORAMPHENICOL HEMISUCCINATE         | antibacterial, antirickettsial, inhibits protein synthesis                      |
| SISOMICIN SULFATE                     | antibacterial, binds to ribosomes                                               |
| NITROMIDE                             | antibacterial, coccidiostat                                                     |
| CIPROFLOXACIN                         | antibacterial, fungicide                                                        |
| CLINDAMYCIN HYDROCHLORIDE             | antibacterial, inhibits protein synthesis                                       |
| CHLOROXYLENOL                         | antibacterial, topical and urinary antiseptic                                   |
| ACTINONIN                             | antibiotic                                                                      |
| AZLOCILLIN SODIUM                     | antibiotic                                                                      |
| BACAMPICILLIN HYDROCHLORIDE           | antibiotic                                                                      |
| BECANAMYCIN SULFATE                   | antibiotic                                                                      |
| BUTIROCIN SULFATE                     | antibiotic                                                                      |
| CEFTRIAXONE SODIUM                    | antibiotic                                                                      |
| CEPHALOSPORIN C SODIUM                | antibiotic                                                                      |
| CITRININ                              | antibiotic                                                                      |
| DIBEKACIN                             | antibiotic                                                                      |
| ERYTHROMYCIN ESTOLATE                 | antibiotic                                                                      |
| LASALOCID SODIUM                      | antibiotic                                                                      |
| MONENSIN SODIUM (monensin A is shown) | antibiotic                                                                      |
| NIGERICIN SODIUM                      | antibiotic                                                                      |
| PATULIN                               | antibiotic                                                                      |
| PENICILLIN G POTASSIUM                | antibiotic                                                                      |
| RIBOSTAMYCIN SULFATE                  | antibiotic                                                                      |
| ROXITHROMYCIN                         | antibiotic                                                                      |
| SALINOMYCIN, SODIUM                   | antibiotic                                                                      |
| SPIRAMYCIN                            | antibiotic                                                                      |
| USNIC ACID                            | antibiotic                                                                      |

|                                                     |                                               |
|-----------------------------------------------------|-----------------------------------------------|
| PAROMOMYCIN SULFATE                                 | antibiotic, antiamebic                        |
| AKLAVINE HYDROCHLORIDE                              | antibiotic, antineoplastic                    |
| URSODIOL                                            | anticholelithogenic                           |
| ALVERINE CITRATE                                    | anticholinergic                               |
| BENZTROPINE                                         | anticholinergic                               |
| CLIDINIUM BROMIDE                                   | anticholinergic                               |
| DICYCLOMINE HYDROCHLORIDE                           | anticholinergic                               |
| ISOPROPAMIDE IODIDE                                 | anticholinergic                               |
| MEPENZOLATE BROMIDE                                 | anticholinergic                               |
| METHSCOPOLAMINE BROMIDE                             | anticholinergic                               |
| OXYPHENCYCLIMINE HYDROCHLORIDE                      | anticholinergic                               |
| PRIDINOL METHANESULFONATE                           | anticholinergic                               |
| PROCYCLIDINE HYDROCHLORIDE                          | anticholinergic                               |
| PROGLUMIDE                                          | anticholinergic                               |
| PROPANTHELINE BROMIDE                               | anticholinergic                               |
| EUCATROPINE HYDROCHLORIDE                           | anticholinergic (ophthalmic)                  |
| HOMATROPINE BROMIDE                                 | anticholinergic (ophthalmic)                  |
| HOMATROPINE METHYLBROMIDE                           | anticholinergic (ophthalmic)                  |
| TROPICAMIDE                                         | anticholinergic (ophthalmic)                  |
| HYOSCYAMINE                                         | anticholinergic, analgesic                    |
| TRIHENYPHENIDYL HYDROCHLORIDE                       | anticholinergic, antiparkinsonian             |
| ANISODAMINE                                         | anticholinergic, antispasmodic                |
| ATROPINE                                            | anticholinergic, mydriatic                    |
| SCOPOLAMINE HYDROBROMIDE                            | anticholinergic, treatment of motion sickness |
| GALANTHAMINE HYDROBROMIDE                           | anticholinesterase, analgesic, antiAlzheimer  |
| 9-AMINO-1,2,3,4-TETRAHYDROACRIDINE<br>HYDROCHLORIDE | anticholinesterase, K channel blocker         |
| CHENODIOL                                           | anticholithogenic, antilipemic agent          |
| ANISINDIONE                                         | anticoagulant                                 |
| DICUMAROL                                           | anticoagulant                                 |
| PHENINDIONE                                         | anticoagulant                                 |
| WARFARIN                                            | anticoagulant, rodenticide                    |
| SULFASALAZINE                                       | anticolitis and Crohn's disease               |
| DIMETHADIONE                                        | anticonvulsant                                |
| ETHOSUXIMIDE                                        | anticonvulsant                                |
| MEPHENTOIN                                          | anticonvulsant                                |
| PHENACEMIDE                                         | anticonvulsant                                |
| PRIMIDONE                                           | anticonvulsant                                |
| VALPROATE SODIUM                                    | anticonvulsant                                |
| PHENYTOIN SODIUM                                    | anticonvulsant, antiepileptic                 |
| ACETYLTRYPTOPHAN                                    | antidepressant                                |
| AMITRIPTYLINE HYDROCHLORIDE                         | antidepressant                                |
| CLOMIPRAMINE HYDROCHLORIDE                          | antidepressant                                |

|                                 |                                                 |
|---------------------------------|-------------------------------------------------|
| COTININE                        | antidepressant                                  |
| DESIPRAMINE HYDROCHLORIDE       | antidepressant                                  |
| DOXEPIN HYDROCHLORIDE           | antidepressant                                  |
| D-PHENYLALANINE                 | antidepressant                                  |
| IMIPRAMINE HYDROCHLORIDE        | antidepressant                                  |
| MAPROTILINE HYDROCHLORIDE       | antidepressant                                  |
| NORTRIPTYLINE                   | antidepressant                                  |
| PHENELZINE SULFATE              | antidepressant                                  |
| TRANLYCYPROMINE SULFATE         | antidepressant                                  |
| TRAZODONE HYDROCHLORIDE         | antidepressant                                  |
| TRIMIPRAMINE MALEATE            | antidepressant                                  |
| AMOXEPINE                       | antidepressant, inhibits norepinephrine uptake  |
| TRYPTOPHAN                      | antidepressant, nutrient                        |
| QUIPAZINE MALEATE               | antidepressant, oxytocic                        |
| CHLORPROPAMIDE                  | antidiabetic                                    |
| TOLAZAMIDE                      | antidiabetic                                    |
| TOLBUTAMIDE                     | antidiabetic                                    |
| HALOPERIDOL                     | antidyskinetic, antipsychotic                   |
| CACODYLIC ACID                  | antieczema, dermatologic, herbicide             |
| BROMOPRIDE                      | antiemetic                                      |
| DIMENHYDRINATE                  | antiemetic                                      |
| MECLIZINE HYDROCHLORIDE         | antiemetic                                      |
| TRIMETHOBENZAMIDE HYDROCHLORIDE | antiemetic                                      |
| CHLORPROMAZINE                  | antiemetic, antipsychotic                       |
| PROCHLORPERAZINE EDISYLATE      | antiemetic, antipsychotic, treatment of vertigo |
| AMINOHYDROXYBUTYRIC ACID        | antiepileptic                                   |
| GEDUNIN                         | antifeedant                                     |
| LUPININE                        | antifeedant, antiinflammatory, oxytoxic         |
| AZADIRACTIN                     | antifeedant, insecticide                        |
| CHLOROACETOXYQUINOLINE          | antifungal                                      |
| CICLOPIROX OLAMINE              | antifungal                                      |
| CLOTRIMAZOLE                    | antifungal                                      |
| ECONAZOLE NITRATE               | antifungal                                      |
| EXALAMIDE                       | antifungal                                      |
| FLUCONAZOLE                     | antifungal                                      |
| FLUTRIMAZOLE                    | antifungal                                      |
| HEXETIDINE                      | antifungal                                      |
| KETOCONAZOLE                    | antifungal                                      |
| SULCONAZOLE NITRATE             | antifungal                                      |
| THIRAM                          | antifungal                                      |
| TOLNAFTATE                      | antifungal                                      |
| MICONAZOLE NITRATE              | antifungal (topical)                            |
| TRIACETIN                       | antifungal (topical)                            |

|                                |                                                                      |
|--------------------------------|----------------------------------------------------------------------|
| TOMATINE                       | antifungal, antibacterial, antiinflammatory agent                    |
| RHAPONTIN                      | antifungal, antioxidant                                              |
| ANTIMYCIN A (A1 shown)         | antifungal, antiviral, interferes in cytochrome oxidation            |
| NYSTATIN                       | antifungal, binds to membrane sterols                                |
| GRISEOFULVIN                   | antifungal, inhibits mitosis in metaphase                            |
| PILOCARPINE NITRATE            | antiglaucoma agent, miotic                                           |
| NARINGIN                       | antihaemorrhagic, antiinflammatory                                   |
| QUERCITRIN                     | antihemorrhagic                                                      |
| THONZYLAMINE HYDROCHLORIDE     | antihistamine                                                        |
| ANTAZOLINE PHOSPHATE           | antihistaminic                                                       |
| CARBINOXAMINE MALEATE          | antihistaminic                                                       |
| CHLORPHENIRAMINE (S) MALEATE   | antihistaminic                                                       |
| CLEMASTINE                     | antihistaminic                                                       |
| DIPHENHYDRAMINE HYDROCHLORIDE  | antihistaminic                                                       |
| DIPHENYLPYRALINE HYDROCHLORIDE | antihistaminic                                                       |
| PHENIRAMINE MALEATE            | antihistaminic                                                       |
| PROMETHAZINE HYDROCHLORIDE     | antihistaminic                                                       |
| PYRILAMINE MALEATE             | antihistaminic                                                       |
| TRIPLENNAMINE CITRATE          | antihistaminic                                                       |
| TRIPROLIDINE HYDROCHLORIDE     | antihistaminic                                                       |
| DOXYLAMINE SUCCINATE           | antihistaminic, hypnotic                                             |
| GLYBURIDE                      | antihyperglycemic                                                    |
| BEZAFIBRATE                    | antihyperlipidemic                                                   |
| CLOFIBRATE                     | antihyperlipidemic                                                   |
| FENOFIBRATE                    | antihyperlipidemic                                                   |
| PROBUCOL                       | antihyperlipidemic                                                   |
| COMPACTIN                      | antihyperlipidemic, HMGCoA reductase inhibitor                       |
| SIMVASTATIN                    | antihyperlipidemic, HMGCoA reductase inhibitor                       |
| NIACIN                         | antihyperlipidemic, vitamin (enzyme cofactor)                        |
| BENFLUOREX HYDROCHLORIDE       | antihyperlipoproteinemic                                             |
| CLOFIBRIC ACID                 | antihyperlipoproteinemic                                             |
| GEMFIBROZIL                    | antihyperlipoproteinemic                                             |
| CARNITINE HYDROCHLORIDE        | antihyperlipoproteinemic, gastric and pancreatic secretion stimulant |
| CAPTOPRIL                      | antihypertensive                                                     |
| CLONIDINE HYDROCHLORIDE        | antihypertensive                                                     |
| gamma-AMINO BUTYRIC ACID       | antihypertensive                                                     |
| GUANABENZ ACETATE              | antihypertensive                                                     |
| HYDRALAZINE HYDROCHLORIDE      | antihypertensive                                                     |
| ISORESERPINE                   | antihypertensive                                                     |
| METHYLDOPA                     | antihypertensive                                                     |
| PARGYLINE HYDROCHLORIDE        | antihypertensive                                                     |
| PHENTOLAMINE HYDROCHLORIDE     | antihypertensive                                                     |

|                             |                                                                   |
|-----------------------------|-------------------------------------------------------------------|
| PRAZOSIN HYDROCHLORIDE      | antihypertensive                                                  |
| PROTOVERATRINE A            | antihypertensive                                                  |
| RESERPINE                   | antihypertensive                                                  |
| URAPIDIL                    | antihypertensive                                                  |
| VERATRINE SULFATE           | antihypertensive                                                  |
| QUINAPRIL HYDROCHLORIDE     | antihypertensive, ACE inhibitor                                   |
| MINOXIDIL                   | antihypertensive, antialopecia agent                              |
| METOPROLOL TARTRATE         | antihypertensive, antianginal                                     |
| ACEBUTOLOL HYDROCHLORIDE    | antihypertensive, antianginal, antiarrhythmic                     |
| PROPRANOLOL HYDROCHLORIDE   | antihypertensive, antianginal, antiarrhythmic                     |
| PINDOLOL                    | antihypertensive, antianginal, antiarrhythmic, antiglaucoma agent |
| SALSOLINE                   | antihypertensive, antihistamine                                   |
| LOSARTAN                    | antihypertensive, AT1 angiotensin II antagonist                   |
| HYDROFLUMETHIAZIDE          | antihypertensive, diuretic                                        |
| PROTOVERATRINE B            | antihypertensive, emetic                                          |
| HEXAMETHONIUM BROMIDE       | antihypertensive, ganglionic blocker                              |
| PENTOLINIUM TARTRATE        | antihypertensive, ganglionic blocker                              |
| GUANETHIDINE SULFATE        | antihypertensive, mitotic agent                                   |
| TODRALAZINE HYDROCHLORIDE   | antihypertensive, peripheral vasodilator                          |
| 1S,9R-beta-HYDRASTINE       | antihypertensive, sedative, antibacterial                         |
| MIDODRINE HYDROCHLORIDE     | antihypertensive, vasoconstrictor                                 |
| METHIMAZOLE                 | antihyperthyroid                                                  |
| PROPYLTHIOURACIL            | antihyperthyroid                                                  |
| ALLOPURINOL                 | antihyperuricemia, antigout, antiurolithic                        |
| METARAMINOL BITARTRATE      | antihypotensive                                                   |
| BENZALKONIUM CHLORIDE       | antiinfective (topical)                                           |
| BENZETHONIUM CHLORIDE       | antiinfective (topical)                                           |
| CETYLPYRIDINIUM CHLORIDE    | antiinfective (topical)                                           |
| HEXACHLOROPHENE             | antiinfective (topical)                                           |
| NITROFURAZONE               | antiinfective (topical)                                           |
| 1S-CAMPHOR                  | antiinfective, antipruritic                                       |
| ACRIFLAVINIUM HYDROCHLORIDE | antiinfective, intercalating agent                                |
| THIMEROSAL                  | antiinfective, preservative                                       |
| ACEMETACIN                  | antiinflammatory                                                  |
| AESCULIN                    | antiinflammatory                                                  |
| BUDESONIDE                  | antiinflammatory                                                  |
| DICLOFENAC SODIUM           | antiinflammatory                                                  |
| ETODOLAC                    | antiinflammatory                                                  |
| FENBUFEN                    | antiinflammatory                                                  |
| FENOPROFEN                  | antiinflammatory                                                  |
| FLUMETHASONE                | antiinflammatory                                                  |
| FLUNISOLIDE                 | antiinflammatory                                                  |
| FLURANDRENOLIDE             | antiinflammatory                                                  |

|                                                       |                                                              |
|-------------------------------------------------------|--------------------------------------------------------------|
| IBUPROFEN                                             | antiinflammatory                                             |
| ISOXICAM                                              | antiinflammatory                                             |
| KETOPROFEN                                            | antiinflammatory                                             |
| KETOROLAC TROMETHAMINE                                | antiinflammatory                                             |
| N- (9-FLUORENYLMETHOXYCARBONYL)-L-LEUCINE (NPC-15199) | antiinflammatory                                             |
| NABUMETONE                                            | antiinflammatory                                             |
| NIMESULIDE                                            | antiinflammatory                                             |
| OXYPHENBUTAZONE                                       | antiinflammatory                                             |
| PHENYLBUTAZONE                                        | antiinflammatory                                             |
| PIROXICAM                                             | antiinflammatory                                             |
| SULINDAC                                              | antiinflammatory                                             |
| SUPROFEN                                              | antiinflammatory                                             |
| TENOXICAM                                             | antiinflammatory                                             |
| TOLMETIN SODIUM                                       | antiinflammatory                                             |
| TRIAMCINOLONE ACETONIDE                               | antiinflammatory                                             |
| TRIAMCINOLONE DIACETATE                               | antiinflammatory                                             |
| TOLFENAMIC ACID                                       | antiinflammatory, analgesia                                  |
| FLUFENAMIC ACID                                       | antiinflammatory, analgesic                                  |
| FLURBIPROFEN                                          | antiinflammatory, analgesic                                  |
| MEFENAMIC ACID                                        | antiinflammatory, analgesic                                  |
| (+)NAPROXEN                                           | antiinflammatory, analgesic, antipyretic                     |
| VULPINIC ACID                                         | antiinflammatory, antimicrobial                              |
| SODIUM MECLOFENAMATE                                  | antiinflammatory, antipyretic                                |
| INDOMETHACIN                                          | antiinflammatory, antipyretic, analgesic                     |
| CARBENOXOLONE SODIUM                                  | antiinflammatory, antisecretory, antiulcer                   |
| FENSPIRIDE HYDROCHLORIDE                              | antiinflammatory, bronchodilator                             |
| GAMBOGIC ACID                                         | antiinflammatory, cytotoxic                                  |
| AMYGDALIN                                             | antiinflammatory, experimental antineoplastic                |
| FLUOCINONIDE                                          | antiinflammatory, glucocorticoid                             |
| PARTHENOLIDE                                          | antiinflammatory, immune suppressant                         |
| ACACETIN                                              | antiinflammatory, spasmolytic agent, antioxidant             |
| CHAULMOOGRIC ACID, ETHYL ESTER                        | antilepreptic                                                |
| AMODIAQUINE DIHYDROCHLORIDE                           | antimalarial                                                 |
| ARTEMISININ                                           | antimalarial                                                 |
| CINCHONIDINE                                          | antimalarial                                                 |
| CINCHONINE                                            | antimalarial                                                 |
| MEFLOQUINE                                            | antimalarial                                                 |
| PRIMAQUINE DIPHOSPHATE                                | antimalarial                                                 |
| PYRIMETHAMINE                                         | antimalarial                                                 |
| QUININE ETHYL CARBONATE                               | antimalarial                                                 |
| CHLOROQUINE DIPHOSPHATE                               | antimalarial, antiamebic, antirheumatic, intercalating agent |
| QUININE SULFATE                                       | antimalarial, skeletal muscle relaxant                       |

|                                     |                                       |
|-------------------------------------|---------------------------------------|
| CEFAMANDOLE SODIUM                  | antimicrobial                         |
| CEFMETAZOLE SODIUM                  | antimicrobial                         |
| CEFOPERAZOLE SODIUM                 | antimicrobial                         |
| CEFOXITIN SODIUM                    | antimicrobial                         |
| CEFSULODIN SODIUM                   | antimicrobial                         |
| CEFUROXIME SODIUM                   | antimicrobial                         |
| CEPHALORIDINE                       | antimicrobial                         |
| FOSPHOMYCIN                         | antimicrobial                         |
| FURAZOLIDONE                        | antimicrobial                         |
| LOMEFLOXACIN HYDROCHLORIDE          | antimicrobial                         |
| METAMPICILLIN SODIUM                | antimicrobial                         |
| OFLOXACIN                           | antimicrobial                         |
| OXOLINIC ACID                       | antimicrobial                         |
| PHTHALYLSULFATHIAZOLE               | antimicrobial                         |
| PIPEMIDIC ACID                      | antimicrobial                         |
| SUCCINYLSULFATHIAZOLE               | antimicrobial                         |
| COLCHICINE                          | antimitotic, antigout agent           |
| PIRACETAM                           | antinauseant                          |
| 1,2-DIMETHYLHYDRAZINE HYDROCHLORIDE | antineoplastic                        |
| ACIVICIN                            | antineoplastic                        |
| ACLACINOMYCIN A1                    | antineoplastic                        |
| ALTRETAMINE                         | antineoplastic                        |
| AMINOLEVULINIC ACID HYDROCHLORIDE   | antineoplastic                        |
| BETULINIC ACID                      | antineoplastic                        |
| BLEOMYCIN (bleomycin B2 shown)      | antineoplastic                        |
| CAMPTOTHECIN                        | antineoplastic                        |
| DACARBAZINE                         | antineoplastic                        |
| MITOMYCIN C                         | antineoplastic                        |
| MITOXANTHRONE HYDROCHLORIDE         | antineoplastic                        |
| MYCOPHENOLIC ACID                   | antineoplastic                        |
| PACLITAXEL                          | antineoplastic                        |
| SEMUSTINE                           | antineoplastic                        |
| CARMUSTINE                          | antineoplastic, alkylating agent      |
| BUSULFAN                            | antineoplastic, alkylating agent      |
| CHLORAMBUCIL                        | antineoplastic, alkylating agent      |
| CYCLOPHOSPHAMIDE HYDRATE            | antineoplastic, alkylating agent      |
| MECHLORETHAMINE                     | antineoplastic, alkylating agent      |
| MELPHALAN                           | antineoplastic, alkylating agent      |
| PIPOBROMAN                          | antineoplastic, alkylating agent      |
| STREPTOZOSIN                        | antineoplastic, alkylating agent      |
| THIODIGLYCOL                        | antineoplastic, alkylating agent      |
| THIOTEPA                            | antineoplastic, alkylating agent      |
| AZASERINE                           | antineoplastic, amino acid antagonist |

|                                               |                                                                                                  |
|-----------------------------------------------|--------------------------------------------------------------------------------------------------|
| JUGLONE                                       | antineoplastic, antifungal                                                                       |
| GELDANAMYCIN                                  | antineoplastic, antifungal, antiprotozoal                                                        |
| CELASTROL                                     | antineoplastic, antiinflammatory, NO synthesis inhibitor, chaperone stimulant                    |
| FLOXURIDINE                                   | antineoplastic, antimetabolite                                                                   |
| SANGUINARINE SULFATE                          | antineoplastic, antiplaque agent                                                                 |
| PUROMYCIN HYDROCHLORIDE                       | antineoplastic, antiprotozoal                                                                    |
| CYTARABINE                                    | antineoplastic, antiviral, antimetabolite                                                        |
| CARBOPLATIN                                   | antineoplastic, convulsant                                                                       |
| CISPLATIN                                     | antineoplastic, convulsant                                                                       |
| TRICHLORMETHINE                               | antineoplastic, cytotoxic                                                                        |
| URETHANE                                      | antineoplastic, cytotoxic                                                                        |
| ETANIDAZOLE                                   | antineoplastic, hypoxic cell radiosensitizer                                                     |
| PODOFILOX                                     | antineoplastic, inhibits microtubule assembly, and human DNA topoisomerase II; antimitotic agent |
| HYDROXYUREA                                   | antineoplastic, inhibits ribonucleoside diphosphate reductase                                    |
| MONOCROTALINE                                 | antineoplastic, insect sterilant                                                                 |
| LEFUNAMIDE                                    | antineoplastic, PDGF receptor blocker                                                            |
| MERCAPTOPYRINE                                | antineoplastic, purine antimetabolite                                                            |
| THIOGUANINE                                   | antineoplastic, purine antimetabolite                                                            |
| 5-AZACYTIDINE                                 | antineoplastic, pyrimidine antimetabolite                                                        |
| FLUOROURACIL                                  | antineoplastic, pyrimidine antimetabolite                                                        |
| 2,6-DI-T-BUTYL-4-METHYLPHENOL                 | antioxidant                                                                                      |
| ETHOXYQUIN                                    | antioxidant                                                                                      |
| GLUTATHIONE                                   | antioxidant                                                                                      |
| POMIFERIN                                     | antioxidant                                                                                      |
| GUAIAZULENE                                   | antioxidant, antiinflammatory, hepatoprotectant                                                  |
| 3-METHYL-1-PHENYL-2-PYRAZOLIN-5-ONE (MCI-186) | antioxidant, lipoxygenase inhibitor                                                              |
| EBSELEN                                       | antioxidant, lipoxygenase inhibitor, inhibits oxidation of LDL                                   |
| SELAMECTIN                                    | antiparasitic, antimitic                                                                         |
| AVERMECTIN B1                                 | antiparasitic                                                                                    |
| LEVODOPA                                      | antiparkinsonian                                                                                 |
| ETHOPROPAZINE HYDROCHLORIDE                   | antiparkinsonian, anticholinergic                                                                |
| 3-AMINOBENZAMIDE                              | antiproliferative, killer cell blocker                                                           |
| DINITOLMIDE                                   | antiprotozoal                                                                                    |
| METRONIDAZOLE                                 | antiprotozoal                                                                                    |
| RONIDAZOLE                                    | antiprotozoal                                                                                    |
| TINIDAZOLE                                    | antiprotozoal                                                                                    |
| ANISOMYCIN                                    | antiprotozoal, antifungal, protein synthesis inhibitor                                           |
| PENTAMIDINE ISETHIONATE                       | antiprotozoal, inhibits nucleic acid & protein synthesis                                         |
| HOMIDIUM BROMIDE                              | antiprotozoal, intercalate with DNA                                                              |
| ACETARSOL                                     | antiprotozoal. diethylamine salt as antiphilic                                                   |
| TRIMEPRAZINE TARTRATE                         | antipruritic                                                                                     |
| ANTHRALIN                                     | antipsoriatic                                                                                    |



|                               |                                              |
|-------------------------------|----------------------------------------------|
| BERGAPTENE                    | antipsoriatic, antiinflammatory              |
| METHOXSALEN                   | antipsoriatic, pigmentation agent            |
| CHLORPROTHIXENE HYDROCHLORIDE | antipsychotic                                |
| CLOZAPINE                     | antipsychotic                                |
| PERICIAZINE                   | antipsychotic                                |
| PERPHENAZINE                  | antipsychotic                                |
| PIMOZIDE                      | antipsychotic                                |
| PROMAZINE HYDROCHLORIDE       | antipsychotic                                |
| SPIPERONE                     | antipsychotic                                |
| THIORIDAZINE HYDROCHLORIDE    | antipsychotic                                |
| THIOTHIXENE                   | antipsychotic                                |
| TRIFLUOPERAZINE HYDROCHLORIDE | antipsychotic                                |
| TRIFLUPROMAZINE HYDROCHLORIDE | antipsychotic                                |
| AMINOPHENAZONE                | antipyretic, analgesic                       |
| BERBERINE CHLORIDE            | antipyretic, antimalarial                    |
| ERGOCALCIFEROL                | antirachitic vitamin                         |
| DIPYROCETYL                   | antirheumatic, analgesic                     |
| RESORCINOL MONOACETATE        | antiseborrheic, antipruritic                 |
| CETRIMONIUM BROMIDE           | antiseptic                                   |
| DEQUALINIUM CHLORIDE          | antiseptic                                   |
| CHLOROCRESOL                  | antiseptic (topical)                         |
| METHYLBENZETHONIUM CHLORIDE   | antiseptic (topical)                         |
| BROXYQUINOLINE                | antiseptic, disinfectant                     |
| RITANSERIN                    | antiserotonin                                |
| DROFENINE HYDROCHLORIDE       | antispasmodic                                |
| ETHAVERINE HYDROCHLORIDE      | antispasmodic                                |
| FLOPROPIONE                   | antispasmodic                                |
| PIPERIDOLATE HYDROCHLORIDE    | antispasmodic                                |
| AMINOTHIAZOLE                 | antithyroid agent                            |
| METHYLTHIOURACIL              | antithyroid agent                            |
| ASARININ (-)                  | antitubercular                               |
| CARBETAPENTANE CITRATE        | antitussive                                  |
| CLOPERASTINE HYDROCHLORIDE    | antitussive                                  |
| DEXTROMETHORPHAN HYDROBROMIDE | antitussive                                  |
| DROPROPIZINE                  | antitussive                                  |
| NOSCAPINE HYDROCHLORIDE       | antitussive                                  |
| ENOXOLONE                     | antitussive, antiinflammatory, antibacterial |
| ACETOXOLONE                   | antiulcer                                    |
| NARINGENIN                    | antiulcer, gibberellin antagonist            |
| CIMETIDINE                    | antiulcerative                               |
| LANSOPRAZOLE                  | antiulcerative                               |
| PIRENZEPINE HYDROCHLORIDE     | antiulcerative                               |
| ACETYL-L-LEUCINE              | antivertigo                                  |

|                                                                        |                                                                                 |
|------------------------------------------------------------------------|---------------------------------------------------------------------------------|
| ACYCLOVIR                                                              | antiviral                                                                       |
| EDOXUDINE                                                              | antiviral                                                                       |
| FAMCICLOVIR                                                            | antiviral                                                                       |
| FOSCARNET SODIUM                                                       | antiviral                                                                       |
| RIBAVIRIN                                                              | antiviral                                                                       |
| TILORONE                                                               | antiviral                                                                       |
| TRIFLURIDINE                                                           | antiviral                                                                       |
| BAICALEIN                                                              | antiviral (HIV)                                                                 |
| AMANTADINE HYDROCHLORIDE                                               | antiviral, antiparkinsonian; treatment of drug-induced extrapyramidal reactions |
| HYDROXYZINE PAMOATE                                                    | anxiolytic, antihistaminic                                                      |
| AMINOGLUTETHIMIDE                                                      | aromatase inhibitor, antineoplastic, testosterone suppressant                   |
| KINETIN                                                                | auxin, plant growth regulator, plant cell division promotor                     |
| PRACTOLOL                                                              | beta adrenergic agonist                                                         |
| PRONETALOL HYDROCHLORIDE                                               | beta adrenergic agonist, antiarrhythmic                                         |
| ATENOLOL                                                               | beta adrenergic blocker                                                         |
| FENOTEROL HYDROBROMIDE                                                 | betaadrenergic agonist                                                          |
| TERBUTALINE HEMISULFATE                                                | betaadrenergic agonist, bronchodilator                                          |
| ALPRENOLOL                                                             | betaadrenergic blocker                                                          |
| NADOLOL                                                                | betaadrenergic blocker                                                          |
| TIMOLOL MALEATE                                                        | betaadrenergic blocker                                                          |
| LYSYLTRYPTOPHANYL-LYSINE ACETATE                                       | binds to DNA                                                                    |
| DYPHYLLINE                                                             | bronchodilator                                                                  |
| ISOPROTERENOL HYDROCHLORIDE                                            | bronchodilator                                                                  |
| METAPROTERENOL                                                         | bronchodilator                                                                  |
| THEOPHYLLINE                                                           | bronchodilator                                                                  |
| IPRATROPIUM BROMIDE                                                    | bronchodilator, antiarrhythmic                                                  |
| TULOButEROL                                                            | bronchodilator, beta adrenergic agonist                                         |
| CLENBUTEROL HYDROCHLORIDE                                              | bronchodilator, beta2 adrenergic agonist                                        |
| EPHEDRINE (1R,2S) HYDROCHLORIDE                                        | bronchodilator, cardiac stimulant                                               |
| RACEPHEDRINE HYDROCHLORIDE                                             | bronchodilator, decongestant                                                    |
| ALBUTEROL                                                              | bronchodilator, tocolytic                                                       |
| LOPERAMIDE HYDROCHLORIDE                                               | Ca channel blocker                                                              |
| N-AMINOHEXYL-5-CHLORO-1-NAPHTHALENESULFONAMIDE HYDROCHLORIDE (W-7 HCl) | calmodulin antagonist, PDE and kinase inhibitor                                 |
| HESPERIDIN                                                             | capillary protectant                                                            |
| QUERCETIN                                                              | capillary protectant                                                            |
| METHAZOLAMIDE                                                          | carbonic anhydrase inhibitor                                                    |
| ACETAZOLAMIDE                                                          | carbonic anhydrase inhibitor, diuretic, antiglaucoma                            |
| AMRINONE                                                               | cardiac stimulant                                                               |
| DIGOXIN                                                                | cardiac stimulant                                                               |
| DIGITOXIN                                                              | cardiotonic                                                                     |
| DOBUTAMINE HYDROCHLORIDE                                               | cardiotonic                                                                     |
| LANATOSIDE C                                                           | cardiotonic                                                                     |

|                                                 |                                               |
|-------------------------------------------------|-----------------------------------------------|
| PERUVOSIDE                                      | cardiotonic                                   |
| STROPHANTHIDIN                                  | cardiotonic                                   |
| SULMAZOLE                                       | cardiotonic                                   |
| DOPAMINE HYDROCHLORIDE                          | cardiotonic, antihypotensive                  |
| HYDRASTININE HYDROCHLORIDE                      | cardiotonic, uterine hemostatic               |
| COENZYME Q10                                    | cardiovascular agent                          |
| 3,5-DINITROCATÉCHOL (OR-486)                    | catechol O-methyltransferase inhibitor        |
| BISACODYL                                       | cathartic                                     |
| DANTRON                                         | cathartic                                     |
| PHENOLPHTHALEIN                                 | cathartic                                     |
| ALOIN                                           | cathartic, laxative                           |
| STRYCHNINE                                      | central stimulant                             |
| EBURNAMONINE                                    | cerebrotonic, muscle stimulant                |
| ZAPRINAST                                       | cGMP phosphodiesterase inhibitor              |
| CHLOROXINE                                      | chelating agent                               |
| GLUCONOLACTONE                                  | chelating agent                               |
| DIMERCAPTOPROPANOL                              | chelating agent (As, Au, Hg)                  |
| CALCEIN                                         | chelating agent (Ca, Mg)                      |
| PENICILLAMINE                                   | chelating agent (Cu), antirheumatic           |
| DEFEROXAMINE MESYLATE                           | chelating agent (Fe & Al)                     |
| TRISODIUM ETHYLENEDIAMINE TETRACETATE           | chelating agent, antioxidant                  |
| KOJIC ACID                                      | chelator, antibacterial, skin whitening agent |
| METHIONYL-LEUCYLPHENYLALANINE ACETATE           | chemotactic peptide                           |
| N-FORMYLMETHIONYLALANINE                        | chemotactic peptide                           |
| N-FORMYLMETHIONYL-LEUCYLPHENYLALANINE           | chemotactic peptide                           |
| 5-NITRO-2-PHENYLPROPYLAMINO BENZOIC ACID [NPPB] | chloride channel blocker                      |
| SODIUM DEHYDROCHOLATE                           | choloretic                                    |
| CHOLINE CHLORIDE                                | choloretic, lipotropic, hepatoprotectant      |
| ACECLIDINE HYDROCHLORIDE                        | cholinergic                                   |
| ACETYL CARNITINE                                | cholinergic                                   |
| BETHANECHOL CHLORIDE                            | cholinergic                                   |
| NEOSTIGMINE BROMIDE                             | cholinergic                                   |
| PYRIDOSTIGMINE BROMIDE                          | cholinergic                                   |
| PHYSOSTIGMINE SALICYLATE                        | cholinergic, anticholinesterase, miotic       |
| METHACHOLINE CHLORIDE                           | cholinergic, diagnostic aid                   |
| CARBACHOL                                       | cholinergic, miotic                           |
| HYDROXYTACRINE MALEATE                          | cholinesterase inhibitor, antiparkinsonian    |
| PRALIDOXIME MESYLATE                            | cholinesterase reactivator                    |
| ACETYL TYROSINE ETHYL ESTER                     | chymotrypsin substrate                        |
| CAFFEINE                                        | CNS stimulant                                 |
| HARMALINE                                       | CNS stimulant, antiparkinsonian agent         |
| AMPROLIUM                                       | coccidiostat                                  |
| RUTILANTINONE                                   | coccidiostat                                  |

|                                                         |                                                              |
|---------------------------------------------------------|--------------------------------------------------------------|
| SODIUM beta-NICOTINAMIDE ADENINE DINUCLEOTIDE PHOSPHATE | cofactor in aryl & steroidal hydroxylation                   |
| ANIRACETAM                                              | cognitive enhancer                                           |
| MEDROXYPROGESTERONE ACETATE                             | contraceptive                                                |
| PICROTOXININ                                            | convulsant, GABA receptor antagonist, ichthyotoxin           |
| DIPYRIDAMOLE                                            | coronary vasodilator                                         |
| FENDILINE HYDROCHLORIDE                                 | coronary vasodilator                                         |
| PERHEXILINE MALEATE                                     | coronary vasodilator                                         |
| ROFECOXIB                                               | COX2 inhibitor, antiinflammatory, antiarthritic              |
| PROADIFEN HYDROCHLORIDE                                 | cytochrome P450 inhibitor, Ca antagonist                     |
| BENSERAZIDE HYDROCHLORIDE                               | decarboxylase inhibitor                                      |
| CARBIDOPA                                               | decarboxylase inhibitor, antiparkinsonism                    |
| PSEUDOEPHEDRINE HYDROCHLORIDE                           | decongestant                                                 |
| 1S,2R-PHENYLPROPANOLAMINE HYDROCHLORIDE                 | decongestant, anorexic                                       |
| MIMOSINE                                                | depilatory agent                                             |
| ROSOLIC ACID                                            | diagnostic aid                                               |
| QUINOLINIC ACID                                         | differentiates between cerebral and forebrain NMDA receptors |
| DIPROTIN A                                              | dipeptidyl peptidase inhibitor, HIV inhibitor                |
| CRESOL                                                  | disinfectant                                                 |
| HALAZONE                                                | disinfectant                                                 |
| OXYQUINOLINE                                            | disinfectant                                                 |
| BENDROFUMETHIAZIDE                                      | diuretic                                                     |
| BUMETANIDE                                              | diuretic                                                     |
| CHRYSIN                                                 | diuretic                                                     |
| CLOPAMIDE                                               | diuretic                                                     |
| CYCLOTHIAZIDE                                           | diuretic                                                     |
| ETHACRYNIC ACID                                         | diuretic                                                     |
| HYDROCHLOROTHIAZIDE                                     | diuretic                                                     |
| TRIAMTERENE                                             | diuretic                                                     |
| UREA                                                    | diuretic                                                     |
| BENZTHIAZIDE                                            | diuretic, antihypertensive                                   |
| CHLOROTHIAZIDE                                          | diuretic, antihypertensive                                   |
| CHLORTHALIDONE                                          | diuretic, antihypertensive                                   |
| FUROSEMIDE                                              | diuretic, antihypertensive                                   |
| INDAPAMIDE                                              | diuretic, antihypertensive                                   |
| METOLAZONE                                              | diuretic, antihypertensive                                   |
| TRICHLORMETHIAZIDE                                      | diuretic, antihypertensive                                   |
| THEOBROMINE                                             | diuretic, bronchodilator, cardiotonic                        |
| PERGOLIDE MESYLATE                                      | dopamine receptor agonist                                    |
| SULPIRIDE                                               | dopamine receptor antagonist, antipsychotic                  |
| APOMORPHINE HYDROCHLORIDE                               | emetic                                                       |
| CHLOROTRIANISENE                                        | estrogen                                                     |
| DIENESTROL                                              | estrogen                                                     |

|                                  |                                                  |
|----------------------------------|--------------------------------------------------|
| DIETHYLSTILBESTROL               | estrogen                                         |
| EQUILIN                          | estrogen                                         |
| ESTRADIOL                        | estrogen                                         |
| ESTRADIOL CYPIONATE              | estrogen                                         |
| ESTRADIOL PROPIONATE             | estrogen                                         |
| ESTRADIOL VALERATE               | estrogen                                         |
| ESTRADIOL-3-SULFATE, SODIUM SALT | estrogen                                         |
| ESTRIOL                          | estrogen                                         |
| ESTRIOL BENZYL ETHER             | estrogen                                         |
| ESTRONE                          | estrogen                                         |
| ESTRONE ACETATE                  | estrogen                                         |
| ESTRONE HEMISUCCINATE            | estrogen                                         |
| HEXESTROL                        | estrogen, antineoplastic (hormonal)              |
| ETHINYL ESTRADIOL                | estrogen, plus progestogen as oral contraceptive |
| ACETYLGLUTAMIC ACID              | excitatory aminoacid                             |
| AMBROXOL HYDROCHLORIDE           | expectorant                                      |
| BROMHEXINE HYDROCHLORIDE         | expectorant                                      |
| GUAIFENESIN                      | expectorant                                      |
| SOLASODINE                       | F11                                              |
| PHENYLMERCURIC ACETATE           | fungicide                                        |
| BICUCULLINE (+)                  | GABA antagonist                                  |
| PIMPINELLIN                      | GABA receptor antagonist, phototoxin             |
| NIPECOTIC ACID                   | GABA uptake inhibitor                            |
| GABOXADOL HYDROCHLORIDE          | GABAa agonist, GABA <sub>c</sub> antagonist      |
| PICROTIN                         | GABAa receptor antagonist                        |
| PREGNENOLONE                     | glucocorticoid, antiinflammatory                 |
| CORTISONE ACETATE                | glucocorticoid                                   |
| DEXAMETHASONE                    | glucocorticoid                                   |
| HYDROCORTISONE HEMISUCCINATE     | glucocorticoid                                   |
| HYDROCORTISONE SODIUM PHOSPHATE  | glucocorticoid                                   |
| MEDRYSONE                        | glucocorticoid                                   |
| METHYLPREDNISOLONE               | glucocorticoid                                   |
| PREDNISOLONE                     | glucocorticoid                                   |
| PREDNISOLONE ACETATE             | glucocorticoid                                   |
| PREDNISON                        | glucocorticoid                                   |
| TRIAMCINOLONE                    | glucocorticoid                                   |
| AMCINONIDE                       | glucocorticoid, antiinflammatory                 |
| BETAMETHASONE                    | glucocorticoid, antiinflammatory                 |
| BETAMETHASONE 17,21-DIPROPIONATE | glucocorticoid, antiinflammatory                 |
| CLOBETASOL PROPIONATE            | glucocorticoid, antiinflammatory                 |
| DEXAMETHASONE ACETATE            | glucocorticoid, antiinflammatory                 |
| DEXAMETHASONE SODIUM PHOSPHATE   | glucocorticoid, antiinflammatory                 |
| DIFLUCORTOLONE PIVALATE          | glucocorticoid, antiinflammatory                 |

|                                    |                                                                 |
|------------------------------------|-----------------------------------------------------------------|
| FLUMETHAZONE PIVALATE              | glucocorticoid, antiinflammatory                                |
| FLUOCINOLONE ACETONIDE             | glucocorticoid, antiinflammatory                                |
| FLUOROMETHOLONE                    | glucocorticoid, antiinflammatory                                |
| HALCINONIDE                        | glucocorticoid, antiinflammatory                                |
| HYDROCORTISONE                     | glucocorticoid, antiinflammatory                                |
| HYDROCORTISONE ACETATE             | glucocorticoid, antiinflammatory                                |
| HYDROCORTISONE BUTYRATE            | glucocorticoid, antiinflammatory                                |
| CLOMIPHENE CITRATE                 | gonad stimulating principle                                     |
| HISTAMINE DIHYDROCHLORIDE          | H receptor agonist                                              |
| CINNARAZINE                        | H1 antihistamine                                                |
| FLUFENAZINE HYDROCHLORIDE          | H1 antihistamine                                                |
| LORATADINE                         | H1 antihistamine                                                |
| MEBHYDROLIN NAPHTHALENESULFONATE   | H1 antihistamine                                                |
| METHAPYRILENE HYDROCHLORIDE        | H1 antihistamine                                                |
| PIMETHIXENE MALEATE                | H1 antihistamine                                                |
| TERFENADINE                        | H1 antihistamine, nonseating                                    |
| FAMOTIDINE                         | H2 antihistamine                                                |
| RANITIDINE                         | H2 antihistamine                                                |
| FOLIC ACID                         | hematopoietic vitamin                                           |
| AMINOCAPROIC ACID                  | hemostatic                                                      |
| TRANEXAMIC ACID                    | hemostatic                                                      |
| ELLAGIC ACID                       | hemostatic, antineoplastic, antimutagenic                       |
| CIANIDANOL                         | hepatoprotectant                                                |
| CITIOLONE                          | hepatoprotectant                                                |
| PROTOPORPHYRIN IX                  | hepatoprotectant                                                |
| THIOCTIC ACID                      | hepatoprotectant                                                |
| CYSTAMINE DIHYDROCHLORIDE          | hepatoprotectant, radioprotectant                               |
| THALIDOMIDE                        | hypnotic                                                        |
| PYRITHYLDIONE                      | hypnotic, sedative                                              |
| LEVAMISOLE HYDROCHLORIDE           | immunomodulator                                                 |
| AMIPRILOSE                         | immunomodulator, antiinflammatory                               |
| CYCLOSPORINE                       | immunosuppressant                                               |
| MIZORIBINE                         | immunosuppressant                                               |
| AZATHIOPRINE                       | immunosuppressant, antineoplastic, antirheumatic                |
| alpha-CYANO-3-HYDROXYCINNAMIC ACID | inhibit mitochondrial pyruvate transport                        |
| alpha-CYANO-4-HYDROXYCINNAMIC ACID | inhibitor of mitochondrial pyruvate transport                   |
| BRETYLIUM TOSYLATE                 | inhibitor of norepinephrine release                             |
| CYCLOPIAZONIC ACID                 | inhibits endoplamic reticulum Ca ATPase                         |
| ACETYLSEROTONIN                    | inhibits hydroxyindole-O-methyltransferase                      |
| PERILLIC ACID (-)                  | inhibits posttranslational cys isoprenylation, blocks G-protein |
| EMETINE                            | inhibits RNA, DNA and protein synthesis                         |
| DEET                               | insect repellent                                                |
| DIELDRIN                           | insecticide                                                     |

|                                                  |                                                  |
|--------------------------------------------------|--------------------------------------------------|
| LINDANE                                          | insecticide                                      |
| ANABASINE HYDROCHLORIDE                          | insecticide                                      |
| MITOTANE                                         | insecticide, antineoplastic                      |
| p-CHLOROPHENYLALANINE                            | Irreversible inhibitor of tryptophan hydroxylase |
| AMINOPYRIDINE                                    | Kchannel blocker                                 |
| DIBENZOTHIOPHENE                                 | keratolytic                                      |
| SODIUM SALICYLATE                                | keratolytic                                      |
| TETROQUINONE                                     | keratolytic                                      |
| TRETINON                                         | keratolytic                                      |
| RESORCINOL                                       | keratolytic, antiseborheic                       |
| LACTULOSE                                        | laxative                                         |
| NORDIHYDROGUARETIC ACID                          | lipoxigenase inhibitor, antioxidant              |
| GOSSYPOL-ACETIC ACID COMPLEX                     | male contraceptive                               |
| HARMOL HYDROCHLORIDE                             | MAO inhibitor                                    |
| N- (2-AMINOETHYL)-4-CHLOROBENZAMIDE (RO-16-6491) | MAOb inhibitor                                   |
| TRIOXSALEN                                       | melanizing agent, antipsoriatic                  |
| beta-ESGIN                                       | membrane permeabilizer                           |
| ANDROSTERONE SODIUM SULFATE                      | menstrual regulation                             |
| DESOXYCORTICOSTERONE ACETATE                     | mineralocorticoid                                |
| FLUDROCORTISONE ACETATE                          | mineralocorticoid                                |
| ISOPILOCARPINE NITRATE                           | miotic                                           |
| IPRONIAZID SULFATE                               | monoamine oxidase inhibitor, antidepressant      |
| NALTREXONE HYDROCHLORIDE                         | morphine antagonist                              |
| ACETYLCYSTEINE                                   | mucoytic                                         |
| MECYSTEINE HYDROCHLORIDE                         | mucoytic                                         |
| MESNA                                            | mucoytic                                         |
| OXOTREMORINE SESQUIFUMARATE                      | muscarinic agonist                               |
| TOLTERODINE HYDROCHLORIDE                        | muscarinic receptor antagonist                   |
| BACLOFEN                                         | muscle relaxant (skeletal)                       |
| CARISOPRODOL                                     | muscle relaxant (skeletal)                       |
| CHLORZOXAZONE                                    | muscle relaxant (skeletal)                       |
| CYCLOBENZAPRINE HYDROCHLORIDE                    | muscle relaxant (skeletal)                       |
| DANTROLENE SODIUM                                | muscle relaxant (skeletal)                       |
| GALLAMINE                                        | muscle relaxant (skeletal)                       |
| MEMANTINE HYDROCHLORIDE                          | muscle relaxant (skeletal)                       |
| MEPHENESIN                                       | muscle relaxant (skeletal)                       |
| METHOCARBAMOL                                    | muscle relaxant (skeletal)                       |
| TOLPERISONE HYDROCHLORIDE                        | muscle relaxant (skeletal)                       |
| ORPHENADRINE CITRATE                             | muscle relaxant (skeletal), antihistaminic       |
| MEBEVERINE HYDROCHLORIDE                         | muscle relaxant (smooth)                         |
| RITODRINE HYDROCHLORIDE                          | muscle relaxant (smooth)                         |
| PAPAVERINE HYDROCHLORIDE                         | muscle relaxant (smooth), cerebral vasodilator   |
| CYCLOPENTOLATE HYDROCHLORIDE                     | mydriatic                                        |

|                                 |                                                                 |
|---------------------------------|-----------------------------------------------------------------|
| PHENYLEPHRINE HYDROCHLORIDE     | mydriatic, decongestant                                         |
| AMILORIDE HYDROCHLORIDE         | Na <sup>+</sup> channel inhibitor, diuretic                     |
| NALOXONE HYDROCHLORIDE          | narcotic antagonist                                             |
| CYCLOLEUCYLGLYCINE              | narcotic induced dopamine receptor sensitivity inhibitor        |
| DROPERIDOL                      | neuroleptic                                                     |
| TIAPRIDE HYDROCHLORIDE          | neuroleptic                                                     |
| SPAGLUMIC ACID                  | neurotransmitter, mgluR3 receptors                              |
| NICOTINE DITARTRATE             | nicotinyl acetylcholine receptor agonist, ectoparasiticide      |
| N-METHYL-D-ASPARTIC ACID (NMDA) | NMDA agonist                                                    |
| CYCLOLEUCINE                    | NMDA receptor antagonist (gly)                                  |
| CANAVANINE                      | NO synthase inhibitor                                           |
| N (g)-NITRO-L-ARGININE          | NO synthase inhibitor                                           |
| SCOPOLETIN                      | NO synthesis (inducible) inhibitor, anticoagulant               |
| TANNIC ACID                     | nonspecific enzyme/receptor blocker                             |
| MECLOFENOXATE HYDROCHLORIDE     | nootropic                                                       |
| KYNURENIC ACID                  | nutritient in vitamin B deficiency diseases                     |
| LEUCINE ENKEPHALIN              | opioid neuromodulator                                           |
| NORETHINDRONE ACETATE           | Oral contraceptive (in combination with estrogen)               |
| SPERMIDINE TRIHYDROCHLORIDE     | ornithine decarboxylase inhibitor                               |
| PUTRESCINE DIHYDROCHLORIDE      | ornithine decarboxylase inhibitor, cell growth factor           |
| ATRACTYLOSIDE POTASSIUM         | oxidative phosphorylation inhibitor                             |
| METHYLERGONOVINE MALEATE        | oxytocic                                                        |
| SPARTEINE SULFATE               | oxytocic                                                        |
| MORIN                           | P450 and ATPase inhibitor                                       |
| SULOCTIDIL                      | peripheral vasodilator                                          |
| 7-HYDROXYETHYLTHEOPHYLLINE      | phosphodiesterase inhibitor                                     |
| CITROPTEN                       | photosensitizing agent                                          |
| BIOCHANIN A                     | phytoestrogen                                                   |
| DAIDZEIN                        | phytoestrogen                                                   |
| CLOPIDOGREL SULFATE             | platelet aggregation inhibitor                                  |
| ETHISTERONE                     | progestogen                                                     |
| HYDROXYPROGESTERONE CAPROATE    | progestogen                                                     |
| NORETHINDRONE                   | progestogen                                                     |
| NORGESTREL                      | progestogen                                                     |
| PROGESTERONE                    | progestogen                                                     |
| NORETHYNODREL                   | progestogen, in combination with estrogen as oral contraceptive |
| BROMOCRIPTINE MESYLATE          | prolactin inhibitor, antiparkinsonian                           |
| STEAROYL CARNITINE CHLORIDE     | protein kinase C inhibitor                                      |
| CYCLOHEXIMIDE                   | protein synthesis inhibitor                                     |
| MENADIONE                       | prothrombogenic agent                                           |
| beta-CAROTENE                   | provitamin A                                                    |
| RETINYL PALMITATE               | provitamin, antixerophthalmic                                   |
| FIPEXIDE HYDROCHLORIDE          | psychostimulant                                                 |



|                                |                                                |
|--------------------------------|------------------------------------------------|
| URIDINE TRIPHOSPHATE TRISODIUM | psychostimulant                                |
| MINAPRINE HYDROCHLORIDE        | psychotropic                                   |
| TRYPTAMINE                     | psychotropic                                   |
| IOPANIC ACID                   | radioopaque agent                              |
| CYCLOCREATINE                  | regulator of creatine biosynthesis             |
| AMINOHIPURIC ACID              | renal function diagnosis                       |
| ZIDOVUDINE [AZT]               | RT transferase inhibitor, antiviral            |
| BENZYL BENZOATE                | scabicide                                      |
| PROPIOMAZINE MALEATE           | sedative, hypnotic                             |
| MELATONIN                      | sleep induction, modifies circadian rhythm     |
| PIPENZOLATE BROMIDE            | spasmolytic                                    |
| MEFEXAMIDE                     | stimulant (central)                            |
| NEOHESPERIDIN DIHYDROCHALCONE  | sweetener                                      |
| SACCHARIN                      | sweetener                                      |
| LIOTHYRONINE SODIUM            | thyroid hormone                                |
| PARACHLOROPHENOL               | topical antibacterial (topical)                |
| TYROTHRICIN                    | topical antibacterial (topical)                |
| DIOXYBENZONE                   | ultraviolet screen                             |
| OXYBENZONE                     | ultraviolet screen                             |
| POTASSIUM p-AMINO BENZOATE     | ultraviolet screen                             |
| ACETOHYDROXAMIC ACID           | urease inhibitor, antiurolithic, antibacterial |
| PROBENECID                     | uricosuric                                     |
| SULFINPYRAZONE                 | uricosuric                                     |
| 1R,9S-HYDRASTINE               | uterine hemostatic, antiseptic                 |
| CHROMOCARB                     | vascular protectant                            |
| DIOSMIN                        | vascular protectant                            |
| RUTOSIDE (rutin)               | vascular protectant                            |
| 7,8-DIHYDROXYFLAVONE           | vascular protectant, antihemorrhagic           |
| LEVONORDEFIN                   | vasoconstrictor                                |
| MEPHENTERMINE SULFATE          | vasoconstrictor                                |
| BETAHISTINE HYDROCHLORIDE      | vasodilator                                    |
| BUCLADESINE                    | vasodilator                                    |
| FLUNARIZINE HYDROCHLORIDE      | vasodilator                                    |
| HEPTAMINOL HYDROCHLORIDE       | vasodilator                                    |
| ISOXSUPRINE HYDROCHLORIDE      | vasodilator                                    |
| KHELLIN                        | vasodilator                                    |
| NAFRONYL OXALATE               | vasodilator                                    |
| NICARDIPINE HYDROCHLORIDE      | vasodilator                                    |
| NICERGOLINE                    | vasodilator                                    |
| NICOTINYL TARTRATE             | vasodilator                                    |
| PENTOXIFYLLINE                 | vasodilator                                    |
| VINCAMINE                      | vasodilator                                    |
| NYLIDRIN HYDROCHLORIDE         | vasodilator (peripheral)                       |

|                             |                             |
|-----------------------------|-----------------------------|
| ADENOSINE PHOSPHATE         | vasodilator, neuromodulator |
| BIOTIN                      | vitamin B complex           |
| BENFOTIAMINE                | vitamin B1                  |
| COBALAMINE                  | vitamin B12                 |
| alpha-TOCHOPHEROL           | vitamin E                   |
| alpha-TOCHOPHERYL ACETATE   | vitamin E                   |
| RETINYL ACETATE             | vitamin precursor           |
| ACEXAMIC ACID               | wound healing agent         |
| ALLANTOIN                   | wound healing agent         |
| 18alpha-GLYCYRRHETINIC ACID |                             |
| ACETYLPHENYLALANINE         |                             |
| ALANYL-DI-LEUCINE           |                             |
| ALANYL-DI-PHENYLALANINE     |                             |
| ARCAINE SULFATE             |                             |
| BATYL ALCOHOL               |                             |
| CREATININE                  |                             |
| DIHYDROSAMIDIN              |                             |
| FELAMIDIN                   |                             |
| HECOGENIN                   |                             |
| HESPERETIN                  |                             |
| NEROL                       |                             |
| O-BENZYL-L-SERINE           |                             |
| OSTHOL                      |                             |
| PEUCEDANIN                  |                             |
| QUINALIZARIN                |                             |
| URSINIC ACID                |                             |
| XANTHURENIC ACID            |                             |
